# Supplementary material
Source: MDPI journal article supplement (https://www.mdpi.com/2073-4441/15/21/3737)
Supplement: s1 [file s1 › water-2658137-supplementary.pdf]

## Supplementary Materials

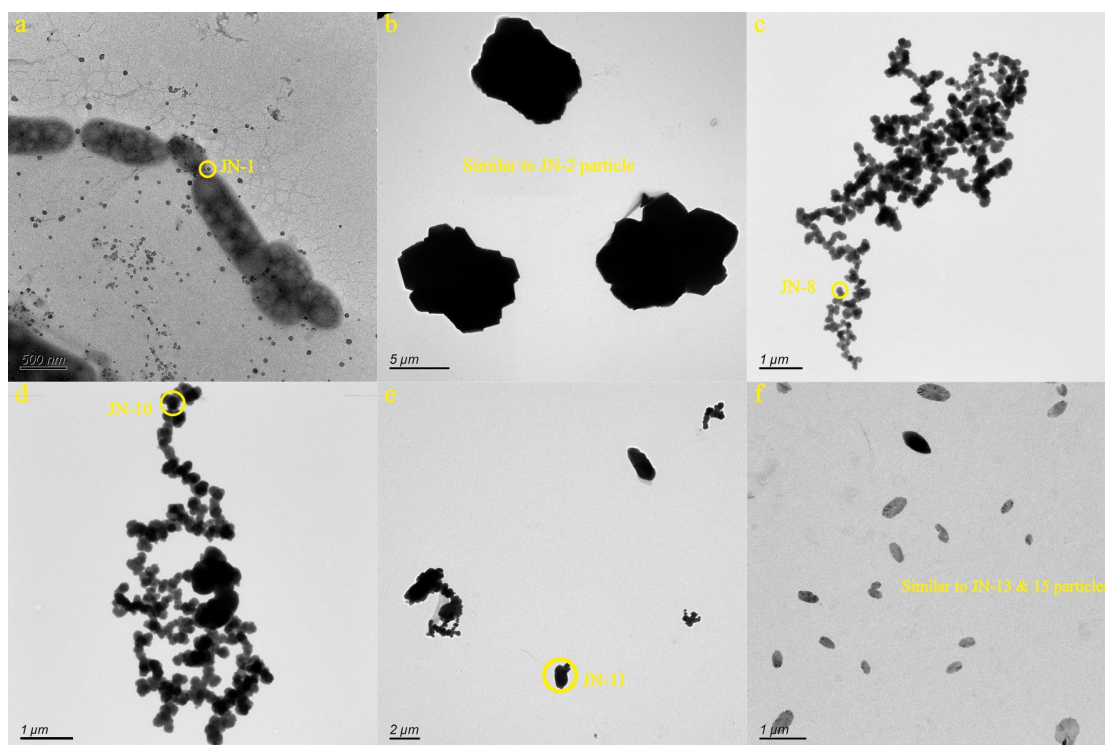

Figure S1. Morphology of Jinan sample particles.

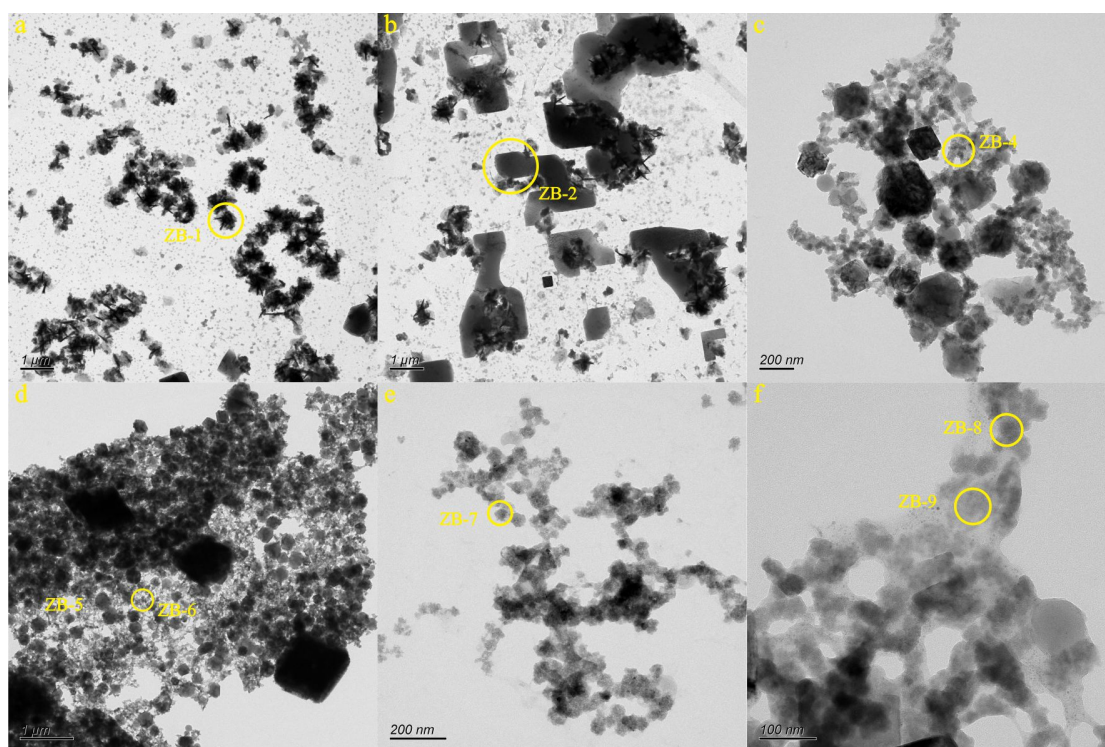

Figure S2. Morphology of Zibo sample particles.
